# Supplementary material for: Influence of Lactose on the Maillard Reaction and Dehydroalanine-Mediated Protein Cross-Linking in Casein and Whey
Source: MDPI journal article supplement (doi:10.3390/foods11070897), 2022-03-22
Supplement: s1 [file s1]

**Supplementary table 1.** Intra- and inter-day precision and accuracy of Nε-(1-Carboxyethyl)-L-lysine (CEL), Nε-(1-Carboxymethyl)-L-lysine (CML), Lanthionine, lysine, lysinoalanine and furosine

| Concentration<br>(ng/mL) | Intra-day precision<br>(%CV, n = 3) | Intra-day accuracy<br>(%, n = 3) | Inter-day precision<br>(%CV, n = 6) | Inter-day accuracy<br>(%, n = 6) |
|--------------------------|-------------------------------------|----------------------------------|-------------------------------------|----------------------------------|
| <b>CEL</b>               |                                     |                                  |                                     |                                  |
| 3.9                      | 126.5                               | 11.6                             | 111.1                               | 16.8                             |
| 7.8                      | 95.0                                | 3.0                              | 96.0                                | 7.6                              |
| 15.6                     | 89.0                                | 2.3                              | 94.6                                | 4.0                              |
| 31.3                     | 90.6                                | 4.2                              | 93.2                                | 4.7                              |
| 62.5                     | 91.8                                | 2.2                              | 95.5                                | 4.4                              |
| 125                      | 98.5                                | 1.9                              | 101.4                               | 24.4                             |
| 250                      | 98.9                                | 2.8                              | 101.4                               | 4.2                              |
| 500                      | 98.9                                | 2.1                              | 98.6                                | 5.4                              |
| 1000                     | 103.3                               | 3.1                              | 103.2                               | 4.8                              |
| 2000                     | 99.3                                | 2.0                              | 99.0                                | 5.1                              |
| <b>CML</b>               |                                     |                                  |                                     |                                  |
| 3.9                      | 123.9                               | 3.8                              | 123.1                               | 17.4                             |
| 7.8                      | 96.9                                | 7.3                              | 103.9                               | 14.0                             |
| 15.6                     | 92.4                                | 6.2                              | 95.3                                | 4.1                              |
| 31.3                     | 94.9                                | 4.3                              | 98.3                                | 4.1                              |
| 62.5                     | 91.7                                | 3.9                              | 94.3                                | 2.7                              |
| 125                      | 102.1                               | 2.7                              | 94.9                                | 1.8                              |
| 250                      | 100.2                               | 0.7                              | 100.8                               | 2.2                              |
| 500                      | 97.9                                | 3.8                              | 96.0                                | 3.3                              |
| 1000                     | 103.0                               | 1.2                              | 101.5                               | 2.2                              |
| 2000                     | 99.4                                | 1.6                              | 98.2                                | 2.5                              |
| <b>Lanthionine</b>       |                                     |                                  |                                     |                                  |
| 15.6                     | 122.0                               | 0.4                              | 107.9                               | 15.3                             |
| 31.3                     | 93.8                                | 9.3                              | 91.7                                | 9.7                              |
| 62.5                     | 96.2                                | 6.9                              | 91.0                                | 5.2                              |
| 125                      | 94.3                                | 3.8                              | 91.0                                | 6.7                              |
| 250                      | 88.4                                | 7.5                              | 89.9                                | 6.3                              |
| 500                      | 94.4                                | 8.5                              | 98.4                                | 16.0                             |
| 1000                     | 96.9                                | 2.4                              | 101.6                               | 5.6                              |
| 2000                     | 96.0                                | 2.2                              | 99.4                                | 7.8                              |
| 4000                     | 105.1                               | 3.0                              | 103.5                               | 6.9                              |
| 8000                     | 99.3                                | 3.3                              | 94.3                                | 5.3                              |
| <b>Lysine</b>            |                                     |                                  |                                     |                                  |
| 3.9                      | 111.7                               | 14.4                             | 119.1                               | 20.6                             |
| 7.8                      | 75.6                                | 2.8                              | 105.0                               | 13.6                             |
| 15.6                     | 88.7                                | 2.0                              | 98.6                                | 9.9                              |
| 31.3                     | 98.3                                | 2.7                              | 97.1                                | 8.4                              |
| 62.5                     | 94.6                                | 5.3                              | 94.9                                | 2.1                              |
| 125                      | 97.6                                | 1.5                              | 98.7                                | 2.9                              |
| 250                      | 98.8                                | 2.7                              | 97.1                                | 3.3                              |

|      |       |     |       |     |
|------|-------|-----|-------|-----|
| 500  | 97.3  | 3.6 | 97.3  | 8.4 |
| 1000 | 104.0 | 2.9 | 102.6 | 3.0 |
| 2000 | 99.3  | 3.6 | 99.6  | 4.4 |

---

**Lysinoalanine**


---

|      |       |      |       |      |
|------|-------|------|-------|------|
| 250  | 83.8  | 6.6  | 96.7  | 5.0  |
| 500  | 88.4  | 18.5 | 94.6  | 7.7  |
| 750  | 93.0  | 8.5  | 93.0  | 6.0  |
| 1000 | 87.8  | 6.4  | 91.6  | 7.2  |
| 2000 | 97.2  | 2.6  | 97.0  | 1.9  |
| 4000 | 113.3 | 6.4  | 104.0 | 10.2 |
| 6000 | 110.7 | 6.4  | 98.2  | 6.2  |
| 8000 | 91.2  | 2.5  | 94.8  | 7.2  |

---

**Furosine**


---

|      |       |      |       |     |
|------|-------|------|-------|-----|
| 3.9  | 115.5 | 11.0 | 105.4 | 4.2 |
| 7.8  | 95.5  | 10.5 | 95.9  | 4.6 |
| 15.6 | 93.9  | 1.5  | 93.5  | 2.2 |
| 31.3 | 94.4  | 2.9  | 94.9  | 3.6 |
| 62.5 | 93.8  | 1.2  | 96.1  | 4.4 |
| 125  | 96.3  | 2.9  | 100.6 | 3.4 |
| 250  | 101.7 | 3.0  | 102.1 | 4.5 |
| 500  | 97.0  | 1.0  | 98.7  | 4.2 |
| 1000 | 103.2 | 1.6  | 103.0 | 3.7 |
| 2000 | 99.5  | 3.0  | 99.8  | 3.9 |

---
